# Supplementary material
Source: PubMed Central journal article supplement (PMC3997259)
Supplement: NIHMS572280-supplement-Supporting_Information.pdf [file NIHMS572280-supplement-Supporting_Information.pdf]

**SUPPORTING INFORMATION - [TABLE]**

**Table S1. Exact mass assays of CoA esters derived from levulinate in perfused rat livers.** The assays were conducted on extracts from 3 livers perfused with unlabeled (M) LEV, [<sup>13</sup>C<sub>5</sub>]LEV (M5), or unlabeled (M) LEV + [ε-<sup>15</sup>N]lysine. The listed compounds assayed are shown in Scheme 1. Compound **4/5** is probably a mixture of tautomers eluting in one peak.

| Metabolites | Substrates                        | Measured (m/z) | Theoretical (m/z) | Difference (ppm) |
|-------------|-----------------------------------|----------------|-------------------|------------------|
| <b>1</b>    | M LEV                             | 866.1593       | 866.1598          | 0.6              |
|             | M5 LEV                            | 871.1758       | 871.1766          | 0.9              |
|             | M LEV+ [ε- <sup>15</sup> N]lysine | 866.1593       | 866.1598          | 0.6              |
| <b>2</b>    | M LEV                             | 908.1708       | 908.1704          | 0.4              |
|             | M5 LEV                            | 913.1875       | 913.1872          | 0.3              |
|             | M LEV+[ε- <sup>15</sup> N]lysine  | 908.1708       | 908.1704          | 0.4              |
| <b>8</b>    | M LEV                             | 910.1859       | 910.1860          | 0.1              |
|             | M5 LEV                            | 915.2023       | 915.2028          | 0.5              |
|             | M LEV+[ε- <sup>15</sup> N]lysine  | 910.1859       | 910.1860          | 0.1              |
| <b>4/5</b>  | M LEV                             | 890.1605       | 890.1598          | 0.8              |
|             | M5 LEV                            | 895.1771       | 895.1766          | 0.6              |
|             | M LEV+[ε- <sup>15</sup> N]lysine  | 890.1605       | 890.1598          | 0.8              |
| <b>6</b>    | M LEV                             | 889.1752       | 889.1758          | 0.7              |
|             | M5 LEV                            | 894.1938       | 894.1926          | 1.3              |
|             | M LEV+[ε- <sup>15</sup> N]lysine  | 890.1722       | 890.1728          | 0.7              |

**SUPPORTING INFORMATION - [FIGURES]**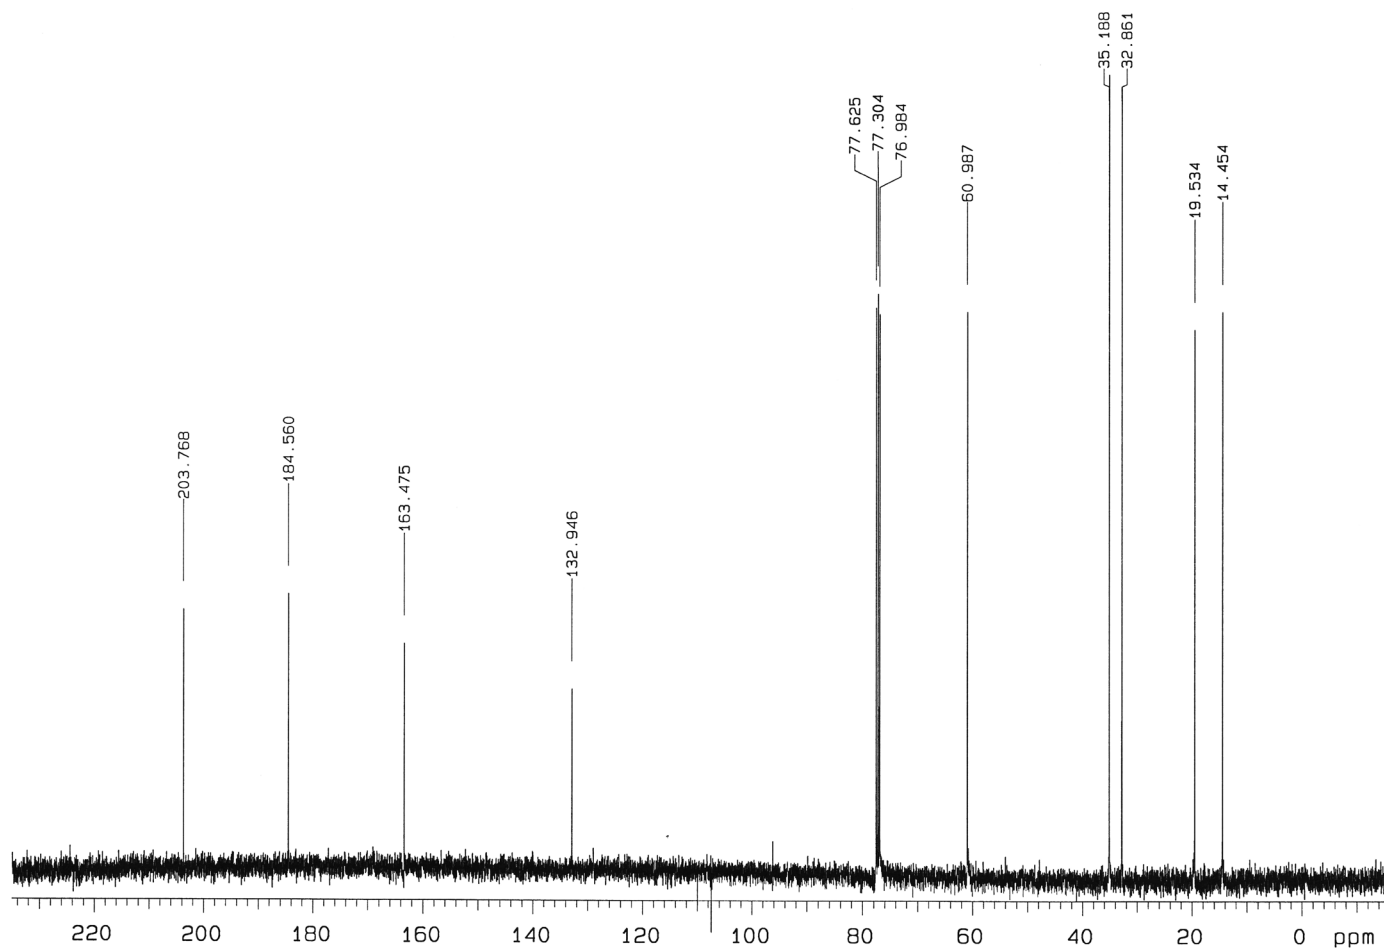

**Figure S1.** <sup>13</sup>C-NMR spectrum of synthesized 3,6-diketoheptanoate ethyl ester **2**. (See Experimental Procedures)

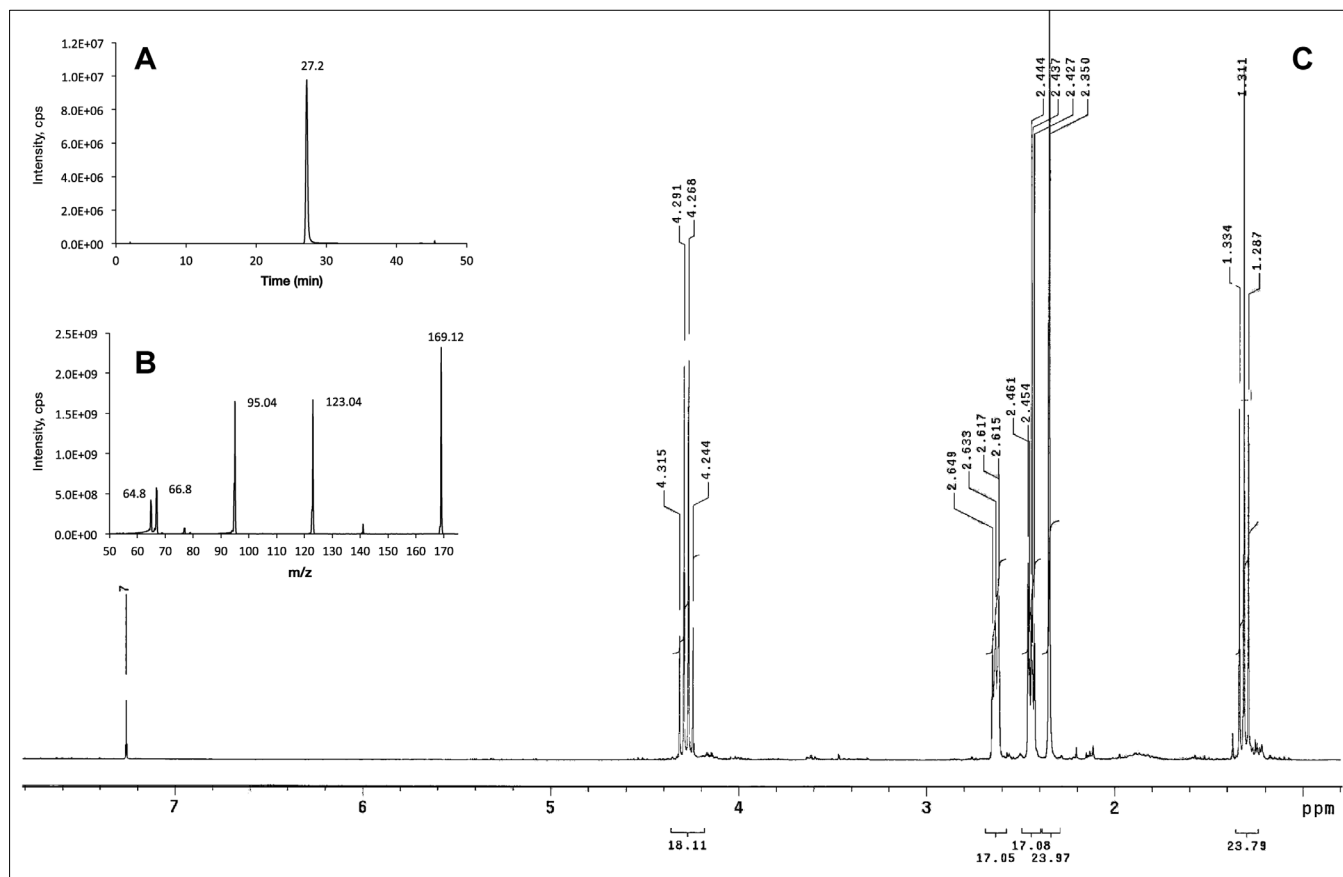

**Figure S2.**  $^1\text{H-NMR}$  and LC/MS spectra of synthesized 2-methyl-5-oxocyclopent-1-enecarboxylic acid ethyl ester **4**.

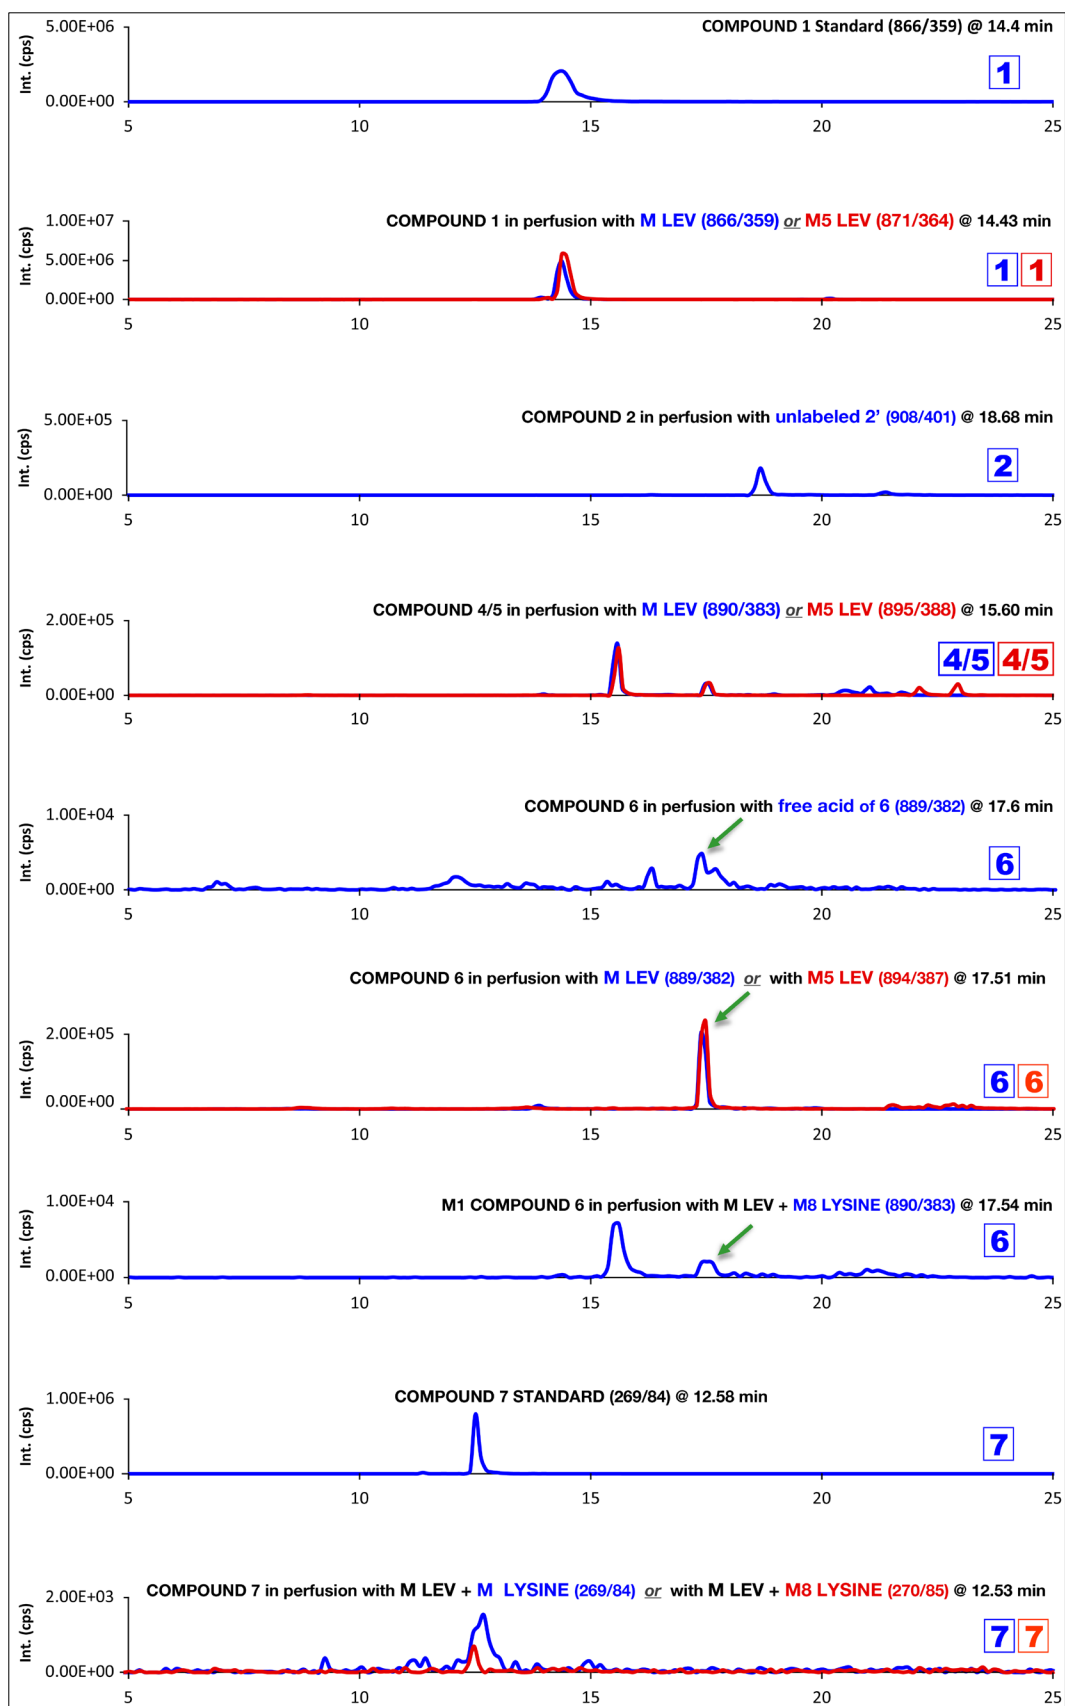

Figure S3. LC/MS data of **1**, **2**, **4/5**, **6**, **7** (Scheme 1, left panel).

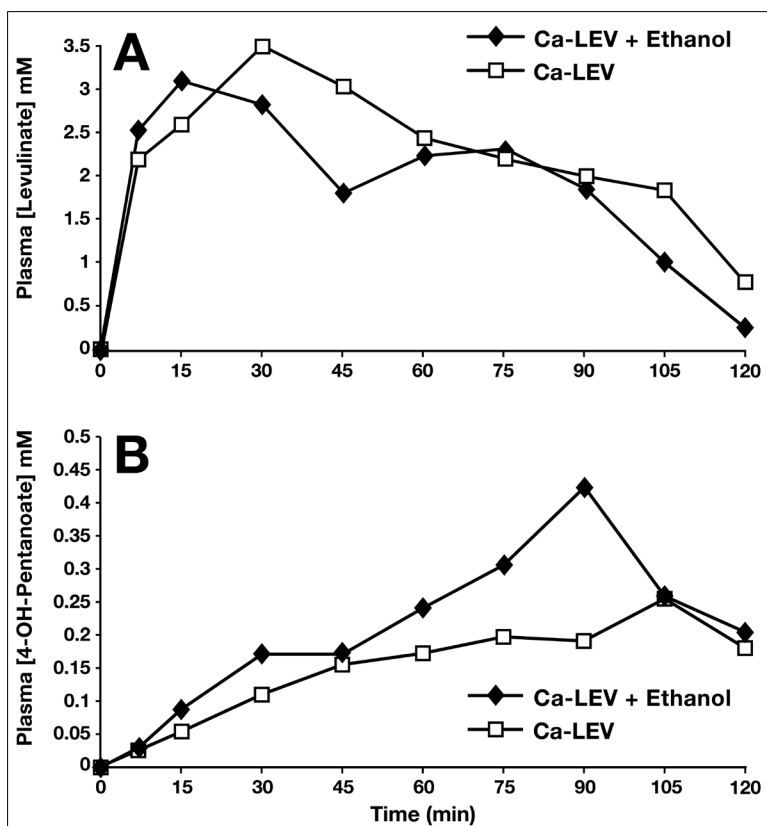

**Figure S4.** Plasma concentrations of levulinate (A) and 4-hydroxypentanoate (B) in rats injected with levulinate  $\pm$  ethanol.

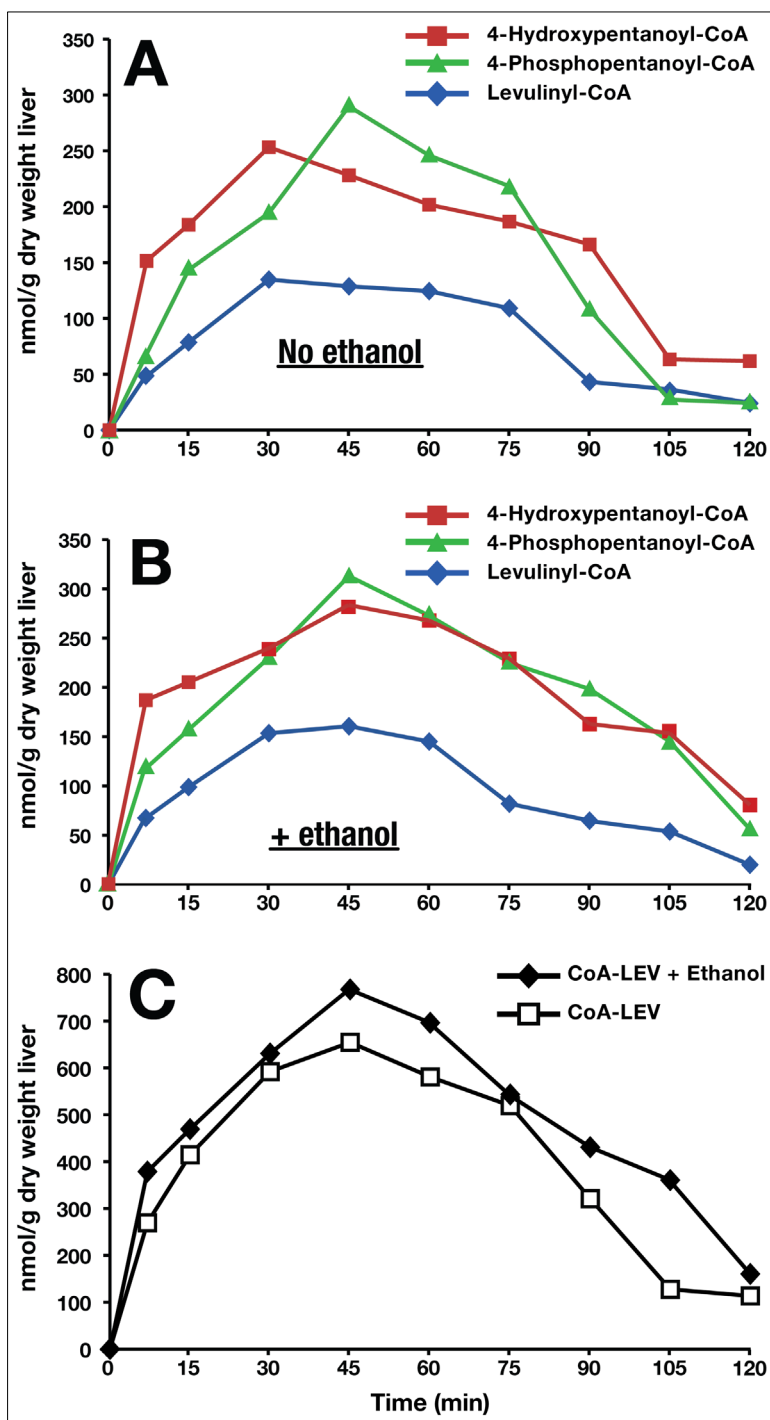

Figure S5. Liver concentrations of the main C<sub>5</sub> acyl-CoAs derived from levulinate in rats gavaged with calcium levulinate ± ethanol.

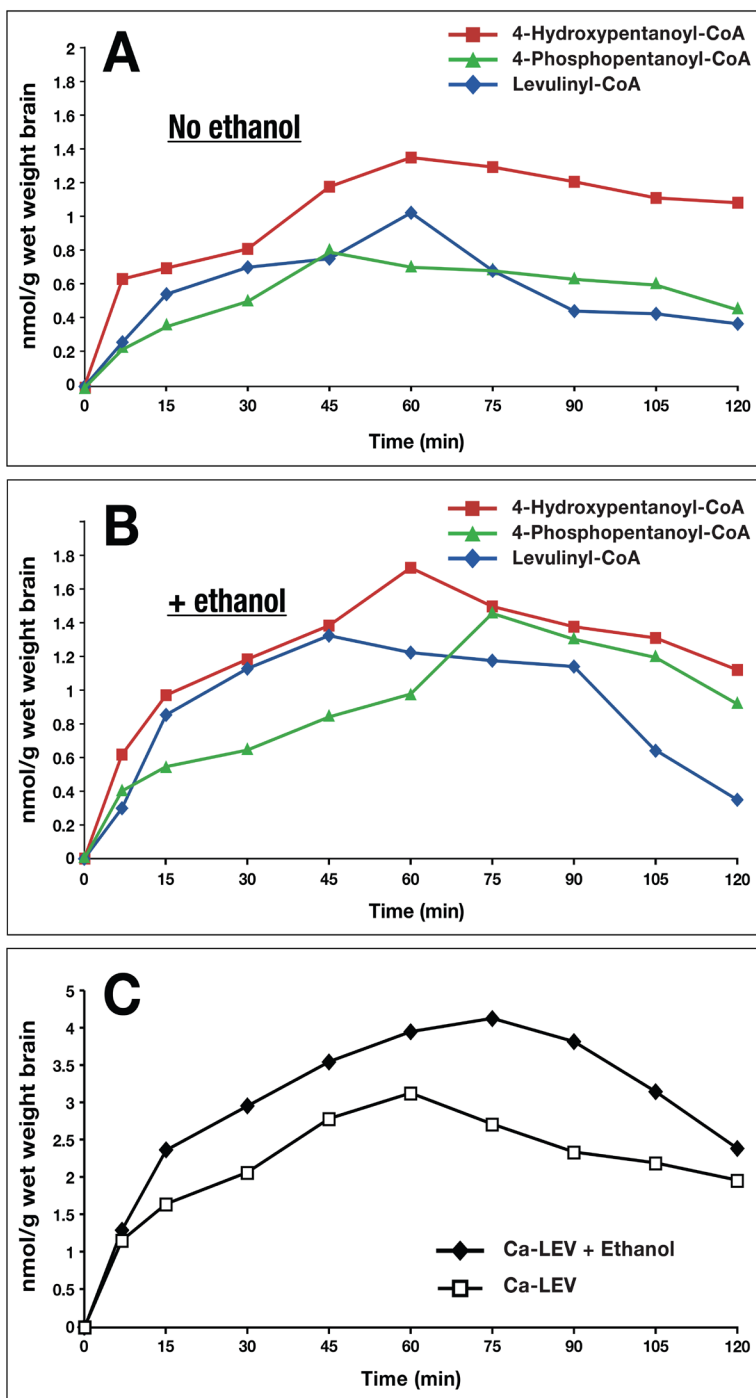

Figure S6. Brain concentrations of the main C<sub>5</sub> CoA esters derived from levulinate in rats gavaged with calcium levulinate ± ethanol.
